# Supplementary material for: Emergency Medicine Cases in Underwater and Hyperbaric Environments: The Use of in situ Simulation as a Learning Technique
Source: Frontiers journal article supplement (doi:10.3389/fphys.2021.666503), 2021-05-21
Supplement: Data_Sheet_5.PDF [file Data_Sheet_5.PDF]

| Scenario Development          |                                                                                                                                                               |
|-------------------------------|---------------------------------------------------------------------------------------------------------------------------------------------------------------|
| Date of Development:          | December 2019 / January 2020                                                                                                                                  |
| Scenario Developer(s):        | Bosco G, Paganini M, Mormando G, Garetto G                                                                                                                    |
| Affiliations/Institutions(s): | Department of Biomedical Sciences (DSB) and Department of Medicine, University of Padova (Padova, Italy);<br>ATIP Hyperbaric Treatment Center (Padova, Italy) |
| Contact E-mail:               | simulazione.dimed@unipd.it                                                                                                                                    |
| Last Revision Date:           | January 31st, 2020                                                                                                                                            |
| Revised By:                   | Fabris F, Camporesi M                                                                                                                                         |
| Version Number:               | 1.0                                                                                                                                                           |

## List of abbreviations

BP: Blood Pressure

CRM: crisis resource management

DCI: decompression illness

GCS: Glasgow Coma Scale

HBOT: Hyperbaric Oxygen Therapy

HR: Heart Rate

O<sub>2</sub>: oxygen

RR: Respiratory Rate

EMS operations centre: Emergency Medical Services operations centre

## Case Summary 05: Shaky depths

|                            |                                         |
|----------------------------|-----------------------------------------|
| <b>Scenario Title:</b>     | <b>Shaky depths</b>                     |
| Keywords:                  | Seizure, syncope, breath-hold diving    |
| Brief Description of Case: | "Taravana/Samba" in a breath-hold diver |

| Goals and Objectives |                                                                                                                                                                                                        |
|----------------------|--------------------------------------------------------------------------------------------------------------------------------------------------------------------------------------------------------|
| Educational Goal:    | Recognition and management of the disease                                                                                                                                                              |
| Medical Objectives:  | <p>Recognize condition</p> <p>Administer oxygen</p> <p>Call for help on-site and call EMS Operations Centre.</p> <p>Ask for transfer to the nearest facility with hyperbaric treatment capability.</p> |
| No CRM objectives    |                                                                                                                                                                                                        |

| Learners, Setting, and Personnel |                                          |                   |                                                      |
|----------------------------------|------------------------------------------|-------------------|------------------------------------------------------|
| Target Learners:                 | <input type="checkbox"/> Junior Learners | X Senior Learners | x Staff                                              |
|                                  | x Physicians                             | x Nurses          | <input type="checkbox"/> RTS<br>X Inter-professional |

|                                     |                                                                  |           |                                 |
|-------------------------------------|------------------------------------------------------------------|-----------|---------------------------------|
|                                     | x Other Learners: Trainees in Diving and Hyperbaric Medicine     |           |                                 |
| Location:                           | <input type="checkbox"/> Sim Lab                                 | x In Situ | <input type="checkbox"/> Other: |
| Recommended Number of Facilitators: | Instructors: 2                                                   |           |                                 |
|                                     | Confederates: 1 divemaster, one breath-hold diver, one bystander |           |                                 |
|                                     | Sim Techs: 1                                                     |           |                                 |

### Initial Patient Information

| Patient Chart                                                                       |                           |           |            |
|-------------------------------------------------------------------------------------|---------------------------|-----------|------------|
| Patient Name: Gianluca                                                              | Age: 27                   | Gender: M | Weight: 68 |
| Presenting complaint: neurologic syndrome after re-emersion from a breath-hold dive |                           |           |            |
| GCS: (E3 V4 M6) 13                                                                  |                           |           |            |
| Allergies: not known                                                                |                           |           |            |
| Past Medical History: no diseases                                                   | Current Medications: none |           |            |

### Extra Patient Information

| Physical Exam  |                                                                                      |
|----------------|--------------------------------------------------------------------------------------|
| Cardio: normal | Neuro: confused but follow simple commands, open eyes when called, right leg shaking |
| Resp: normal   | Head & Neck: normal                                                                  |
| Abdo: normal   | MSK/skin: normal                                                                     |
| Other: /       |                                                                                      |

### Technical Requirements/Room Vision

| Patient                                                                                       |
|-----------------------------------------------------------------------------------------------|
| <input type="checkbox"/> Mannequin ( <i>specify the type and whether infant/child/adult</i> ) |
| X Standardized Patient                                                                        |
| <input type="checkbox"/> Task Trainer                                                         |
| <input type="checkbox"/> Hybrid                                                               |
| Special Equipment Required, Required Medications, Moulage                                     |
| Mobile phone<br>Oxygen cylinder and non-rebreathing mask                                      |

|                                                                                                                                         |
|-----------------------------------------------------------------------------------------------------------------------------------------|
| Swimsuit                                                                                                                                |
| <b>Monitors at Case Onset</b>                                                                                                           |
| <input type="checkbox"/> Patient on a monitor with vitals displayed<br><input checked="" type="checkbox"/> Patient not yet on a monitor |
| <b>Patient Reactions and Exam</b>                                                                                                       |
| Right leg shaky, then stops but numbness and motor deficit.                                                                             |

### Confederates and Standardized Patients

| Confederate and Standardized Patient Roles and Scripts |                                                                              |
|--------------------------------------------------------|------------------------------------------------------------------------------|
| <i>Divemaster</i>                                      | Supportive - He rescues the diver from water, asks to bring O2 and calls EMS |

## Scenario Progression

| Scenario States, Modifiers, and Triggers |                                                                                                          |                                                                                                                                                                                                                                                                              |                                                                                                                              |                   |
|------------------------------------------|----------------------------------------------------------------------------------------------------------|------------------------------------------------------------------------------------------------------------------------------------------------------------------------------------------------------------------------------------------------------------------------------|------------------------------------------------------------------------------------------------------------------------------|-------------------|
| Patient State/Vitals                     | Patient Status                                                                                           | Learner Actions, Modifiers & Triggers to Move to Next State                                                                                                                                                                                                                  |                                                                                                                              | Facilitator Notes |
| <b>1. Baseline State</b><br><br>GCS: 13  | Rescued by the divemaster. Confused but follow simple commands, open eyes when called, right leg shaking | <u>Expected Learners Actions</u> <ul style="list-style-type: none"> <li>Ask what happened to the divemaster</li> <li>Ask the patient's symptoms and past medical history.</li> <li>Suspect "taravana" syndrome and ask for oxygen cylinder + non-rebreathing mask</li> </ul> | <u>Modifiers and Triggers</u><br><br>Ask for oxygen → continue to point 2<br><br>Not oxygen → stop scenario after 3 minutes. | -                 |
| <b>2.</b>                                | Less confused with oxygen, stop shaking, says feeling numbness and motor deficit in the right leg.       | <u>Expected Learners Actions</u> <ul style="list-style-type: none"> <li>Confirm taravana with the possible complication of DCI</li> <li>A phone call to EMS operations center</li> <li>Ask for a transfer to an ED with HBOT capability.</li> </ul>                          | <u>Modifiers and Triggers</u><br><br>End scenario                                                                            | -                 |

## Facilitator Cheat Sheet & Debriefing Tips

- The facilitator asks the team, "How did you feel? What are the emotions you felt?"
- Brief Case Summary
- The facilitator invites the team to produce a "Plus/Delta/Solutions" chart describing: "what went well" (Plus); "what could be improved" (Delta); "what we will do next time" (Solutions).
- To help the team, the facilitator asks questions such as: "What actions or things would you perform again in the same clinical case in reality tomorrow?"
- Address the critical points (e.g., assessing the patient's level of consciousness, decompression when necessary, assessing possible causes of illness, etc.).
- Discuss errors or lack of actions and reflect on the causes to find solutions
- Conclusions on positive things done and answers found to possible errors

## References

1. Bosco G, Rizzato A, Martani L, Schiavo S, Talamonti E, Garetto G, Paganini M, Camporesi EM, Moon RE. Arterial Blood Gas Analysis in Breath-Hold Divers at Depth. *Front Physiol.* 2018 Nov 5;9:1558. doi: 10.3389/fphys.2018.01558.
2. Lindholm P, Lundgren CE. The physiology and pathophysiology of human breath-hold diving. *J Appl Physiol* (1985). 2009 Jan;106(1):284-92. Doi: 10.1152/jappphysiol.90991.2008. Epub 2008 Oct 30. PMID: 18974367.
